# Supplementary material for: Targeted Lipidomics for Characterization of PUFAs and Eicosanoids in Extracellular Vesicles
Source: MDPI journal article supplement (doi:10.3390/nu14071319), 2022-03-22
Supplement: s1 [file s1]

Supplementary Materials

# Targeted Lipidomics for Characterization of PUFAs and Eicosanoids in Extracellular Vesicles

Madlen Reinicke <sup>†</sup>, Saikal Shamkeeva <sup>†</sup>, Max Hell, Berend Isermann, Uta Ceglarek and Mitja L. Heinemann <sup>\*</sup>

Institute of Laboratory Medicine, Clinical Chemistry and Molecular Diagnostics, Leipzig University Hospital, Paul-List-Str. 13-15, 04103 Leipzig, Germany; madlen.reinicke@medizin.uni-leipzig.de (M.R.); saikal.shamkeeva@medizin.uni-leipzig.de (S.S.); mhell97@gmx.de (M.H.); berend.isermann@medizin.uni-leipzig.de (B.I.); uta.ceglarek@medizin.uni-leipzig.de (U.C.)  
<sup>\*</sup> Correspondence: mitja.heinemann@medizin.uni-leipzig.de (M.L.H.)  
<sup>†</sup> These authors contributed equally to this work.

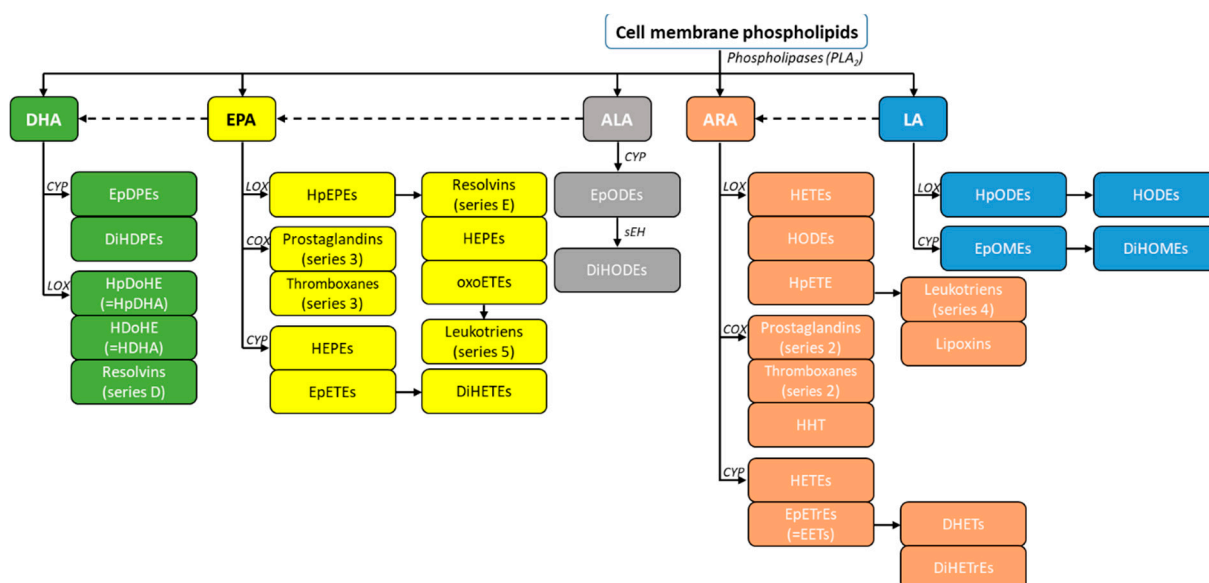

**Figure S1.** Simplified PUFA metabolism with the most relevant enzyme classes. ALA - alpha linolenic acid; ARA - arachidonic acid; COX - cyclooxygenase; CYP - cytochrome P450; DHA - docosahexaenoic acid; DHET - dihydroxyeicosatrienoic acid; DiHETe - dihydroxyeicosatrienoic acid; DiHDPE - dihydroxydocosapentaenoic acid; DiHETE - dihydroxyeicosatetraenoic acid; DiHODE - dihydroxyoctadecadienoic acid; DiHOME - dihydroxyoctadecamonoenoic acid; EPA - eicosapentaenoic acid; EpDPE - epoxydocosapentaenoic acid; EpETE - epoxyeicosatetraenoic acid; EpETe (=EET) - epoxyeicosatrienoic acid; EpODE - epoxyoctadecadienoic acid; EpOME - epoxyoctadecamonoenoic acid; HDoHE (=HDHA) - hydroxydocosahexaenoic acid; HEPE - hydroxyeicosapentaenoic acid; HETE - hydroxyeicosatetraenoic acid; HHT - hydroxyheptadecatrienoic acid; HODE - hydroxyoctadecadienoic acid; HpDoHE (=HpDHA) - hydroperoxydocosahexaenoic acid; HpEPE - hydroperoxyeicosapentaenoic acid; HpETE - hydroperoxyeicosatetraenoic acid; HpODE - hydroperoxyoctadecadienoic acid; LA - linoleic acid; LOX - lipoxygenase; oxoETE - oxoeicosatetraenoic acid; PLA<sub>2</sub> - phospholipase A<sub>2</sub>; PUFA - polyunsaturated fatty acid; sEH - soluble epoxide hydrolase.

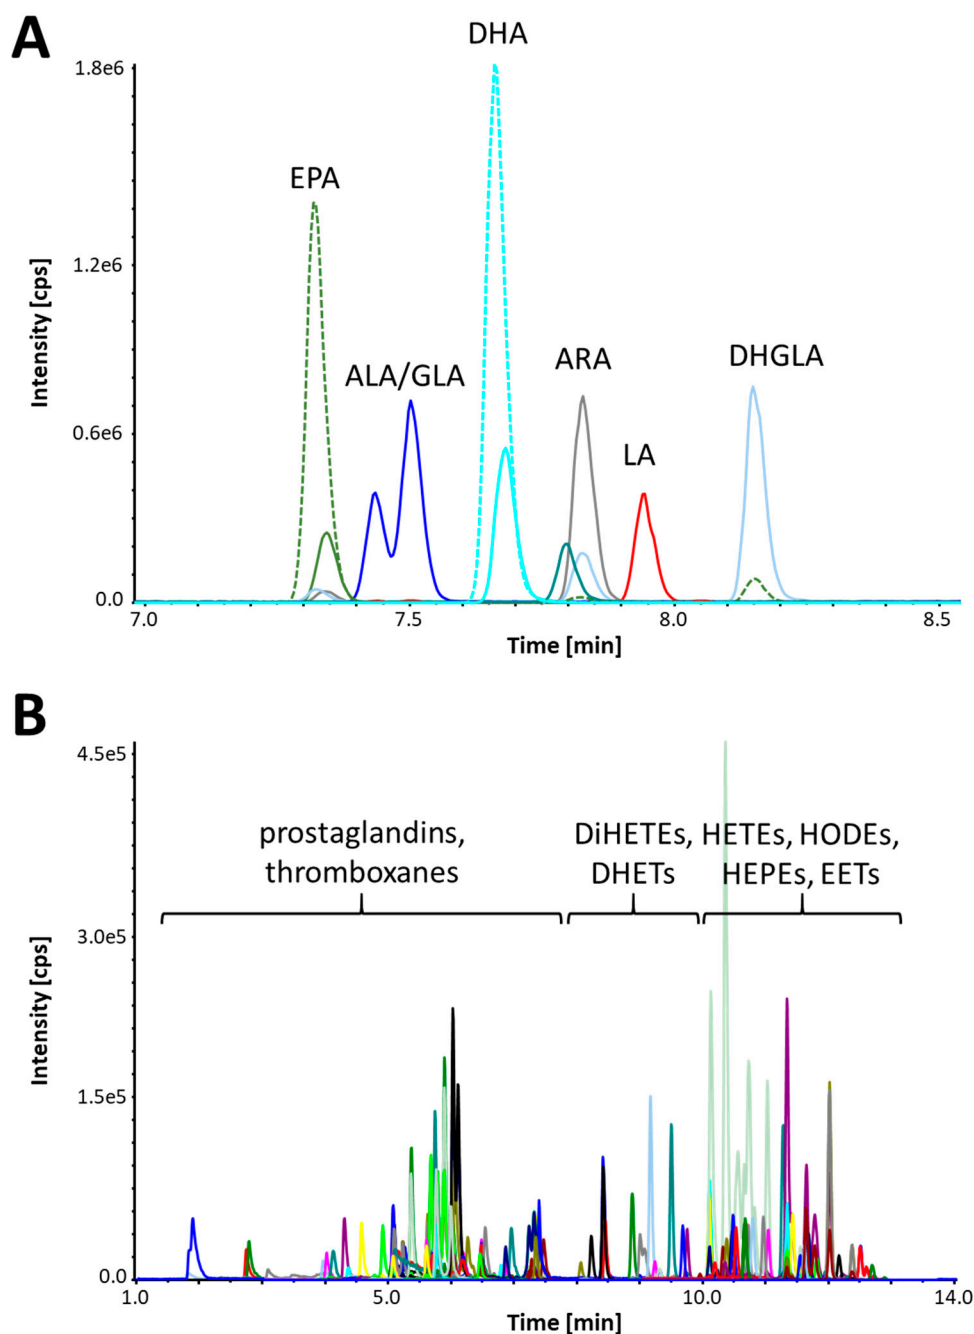

**Figure S2.** LC-MS/MS chromatogram of a standard mixture of (A) PUFAs, 1 µg/mL, (B) eicosanoids, 1 ng/mL. ALA - alpha linolenic acid; ARA - arachidonic acid; DHA - docosahexaenoic acid; DHET - dihydroxyeicosatrienoic acid; DHGLA - dihomogamma-linolenic acid; DiHETE - dihydroxyeicosatetraenoic acid; EET - epoxyeicosatrienoic acid; EPA - eicosapentaenoic acid; GLA - gamma linolenic acid; HEPE - hydroxyeicosapentaenoic acid; HETE - hydroxyeicosatetraenoic acid; HODE - hydroxyoctadecadienoic acid; LA - linoleic acid; LC-MS/MS - liquid chromatography - tandem mass spectrometry; PUFA - polyunsaturated fatty acid.

**Table S1.** Selection of mass spectrometric methods for lipid analysis of EVs.

| Author                               | EV Isolation method              | Lipid extraction                                  | Method for lipid analysis | Lipid analytes                                                                                             |
|--------------------------------------|----------------------------------|---------------------------------------------------|---------------------------|------------------------------------------------------------------------------------------------------------|
| Subra <i>et al.</i> 2010 (18)        | ultracentrifugation              | Bligh and Dyer (25) and ethyl acetate             | GC-MS                     | differently saturated FA (C <sub>14</sub> -C <sub>24</sub> ), PG series 2                                  |
| Esser <i>et al.</i> 2010 (15)        | ultracentrifugation / filtration | chloroform/MeOH (2:1) followed by hydrolysis      | LC-MS/MS                  | LT serie 4, 5-HETE, 5-KETE, 15-HETE, 12-HETE, 15-KETE (samples were incubated with ARA, LTA <sub>4</sub> ) |
| Llorente <i>et al.</i> 2013 (26)     | ultracentrifugation              | chloroform/MeOH (2:1)                             | LC-MS/MS                  | HexCer, LacCer and SM lipid classes; PC lipid class                                                        |
| Duchez <i>et al.</i> 2015 (16)       | ultracentrifugation              | chloroform/MeOH (2:1)                             | LC-MS/MS                  | 12-LOX (Enzyme), 12-HETE                                                                                   |
| Haraszti <i>et al.</i> 2016 (27)     | ultracentrifugation              | chloroform/MeOH (1:1)                             | MS/MS                     | untargeted lipidomics, including differently saturated FA (C <sub>12</sub> -C <sub>22</sub> ),             |
| Dang <i>et al.</i> 2017 (72)         | ultracentrifugation / filtration | MeOH/DCM (2:0,9)                                  | MS/MS                     | untargeted lipidomics, including differently saturated FA (C <sub>14</sub> -C <sub>22</sub> )              |
| Brzozowski <i>et al.</i> 2018 (29)   | ultrafiltration                  | chloroform/MeOH (1:1)                             | LC-MS/MS                  | glycerolipids, glycerophospholipids, sphingolipids, fatty acids and sterol lipids                          |
| Hough <i>et al.</i> 2018 (17)        | ultracentrifugation              | chloroform/MeOH (1:2)                             | MS/MS                     | untargeted lipidomics, including sphingomyelins, glycerophospholipids and ceramides                        |
| Chen <i>et al.</i> 2019 (40)         | ultracentrifugation              | MeOH/DCM (1:1) with 5 mM ammonium acetate         | MS/MS                     | untargeted lipidomics, including saturated and unsaturated species (e.g. Cer, LPC, PC)                     |
| Lacy <i>et al.</i> 2019 (73)         | ultracentrifugation              | directly from precipitate                         | LC-MS/MS                  | PG series 2                                                                                                |
| Nishida-Aoki <i>et al.</i> 2020 (28) | ultracentrifugation / filtration | MeOH/chloroform/water (10:5:3)                    | MS/MS                     | untargeted lipidomics, including FA, cholesterol, CE and TG                                                |
| Surmiak <i>et al.</i> 2020 (38)      | ultracentrifugation / filtration | tert-butyl-ether/MeOH (80:20) after acidification | LC-MS/MS                  | LT series 4, 5-HETE, 12-HETE, 5-oxo-EETE, 13,14-dihydro-15-keto-PGE <sub>2</sub>                           |

ARA - arachidonic acid; Cer - ceramides; COX - cyclooxygenase; CE - cholesteryl ester; DCM - dichloromethane; DHA - docosahexaenoic acid; EV - extracellular vesicle; ETE - eicosatetraenoic acid; FA - fatty acid; GC - gas chromatography; HETE - hydroxyeicosatetraenoic acid; HexCer - hexosylceramide; KETE - ketoico-

---

satetraenoic acid; LacCer - lactosylceramide; LOX - lipoxygenase; LT - leukotriene; LPC - lysophosphatidylcholine; LC-MS/MS - liquid chromatography - tandem mass spectrometry; LXA4 - Lipoxin A4, MeOH - methanol; PC - phosphatidylcholine; PG - prostaglandin; PGE2 - prostaglandin E2; PUFA - polyunsaturated fatty acid; SM - sphingomyelin; TG – triacylglycerol.

**Table S2.** Primer list for RT-qPCR targeting M1/M2 marker expression.

| Number | Oligoname | Gene                        | Sequence                  | Target     |
|--------|-----------|-----------------------------|---------------------------|------------|
| Pr1    | hACTB-F   | ACTB                        | ATTGCCGACAGGATGCAGAA      | THP-1 (M0) |
| Pr2    | hACTB-R   | ACTB                        | GCTGATCCACATCTGCTGGAA     | THP-1 (M0) |
| Pr3    | hTNF-a_F  | TNF-alpha                   | CTTCTGCCTGCTGCACTTTG      | THP-1 (M1) |
| Pr4    | hTNF-a_R  | TNF-alpha                   | GGCCAGAGGGCTGATTAGAGA     | THP-1 (M1) |
| Pr5    | hIL-1B_F  | Interleukin-1-Beta          | CAGTGGCAATGAGGATGACTTG    | THP-1 (M1) |
| Pr6    | hIL-1B_R  | Interleukin-1-Beta          | AGTGGTGGTCCGAGATTCGT      | THP-1 (M1) |
| Pr7    | hCXCL10_F | C-X-C motif<br>chemokine 10 | ATTCCTGCAAGCCAATTTTGTC    | THP-1 (M1) |
| Pr8    | hCXCL10_R | C-X-C motif<br>chemokine 10 | CATCTCTTCTCACCCCTTCTTTTCA | THP-1 (M1) |
| Pr9    | hCD23_F   | CD23                        | CCCGGAACGTCTCTCAAGTTT     | THP-1 (M2) |
| Pr10   | hCD23_R   | CD23                        | TCAGCTCGAAGTTCCTCCAGTT    | THP-1 (M2) |
| Pr11   | hCD209_F  | CD209 / DC-SIGN             | TCAAGCAGTATTGGAACAGAGGA   | THP-1 (M2) |
| Pr12   | hCD209_R  | CD209 / DC-SIGN             | CAGGAGGCTGCGGACTTTTT      | THP-1 (M2) |

**Table S3.** Comparison of precipitation solutions. Statistics: one-way ANOVA with follow-up multiple comparison test (Dunnnett).

| p value                 | one-way ANOVA | multiple comparison test (Dunnnett) |         |         |
|-------------------------|---------------|-------------------------------------|---------|---------|
|                         |               | A vs. B                             | A vs. C | A vs. D |
| <b>DHA</b>              | <0.0001       | <0.0001                             | <0.0001 | <0.0001 |
| <b>ARA</b>              | <0.0001       | 0.0124                              | 0.001   | 0.0261  |
| <b>LA</b>               | <0.0001       | 0.0012                              | <0.0001 | <0.0001 |
| <b>Tetranor-12-HETE</b> | <0.0001       | 0.0016                              | <0.0001 | 0.0001  |
| <b>13-HODE</b>          | 0.0003        | 0.0018                              | 0.0001  | 0.0006  |
| <b>9-HODE</b>           | <0.0001       | 0.0007                              | <0.0001 | 0.0002  |
| <b>8-HETE/12-HETE</b>   | 0.0006        | 0.0711                              | 0.0003  | 0.0031  |

A: MeOH\*BHT/H<sub>2</sub>O\*ZnSO<sub>4</sub> (80:20 v/v, 56 mg/L BHT, 17.8 g/L ZnSO<sub>4</sub>), B: MeOH\*BHT (56 mg/L BHT), C: n-hexane/iPrOH (60:40 v/v), D: ACN/H<sub>2</sub>O (80:20 v/v)
